# Supplementary material for: Mitochondrial DNA Copy Number Raises the Potential of Left Frontopolar Hemodynamic Response as a Diagnostic Marker for Distinguishing Bipolar Disorder From Major Depressive Disorder
Source: PubMed Central journal article supplement (PMC6518968; doi:10.3389/fpsyt.2019.00312), 2019-05-08
Supplement: Image_2.pdf [file Image_2.pdf]

## *Supplementary Material 6*

### **Mitochondrial DNA copy number raises the potential of left frontopolar hemodynamic response as a diagnostic marker for distinguishing bipolar disorder from major depressive disorder**

**Noa Tsujii<sup>†</sup>, Ikuo Otsuka<sup>†</sup>, Satoshi Okazaki, Masaya Yanagi, Shusuke Numata, Naruhisa Yamaki, Yoshihiro Kawakubo, Osamu Shirakawa, Akitoyo Hishimoto<sup>\*</sup>**

<sup>†</sup> These authors contributed equally to this work.

**\* Correspondence:** Akitoyo Hishimoto: [hishipon@med.kobe-u.ac.jp](mailto:hishipon@med.kobe-u.ac.jp)

**Supplementary Figure 2. Correlation analysis of candidate variables for multivariate logistic regression analysis**

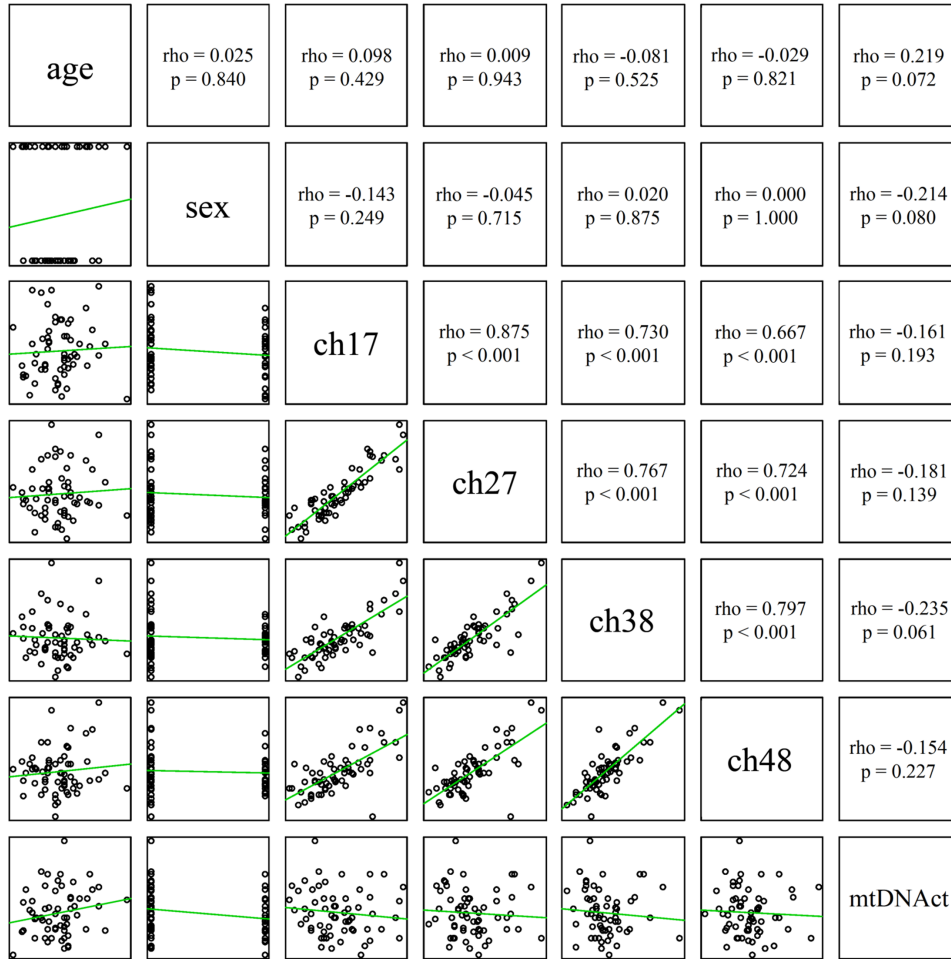

**Supplementary Figure 2.** Spearman correlation analyses were performed. Correlation coefficients and p-values are presented in the upper right corner and scatter plots in the upper right corner.
