# Supplementary material for: Mitochondrial DNA Copy Number Raises the Potential of Left Frontopolar Hemodynamic Response as a Diagnostic Marker for Distinguishing Bipolar Disorder From Major Depressive Disorder
Source: PubMed Central journal article supplement (PMC6518968; doi:10.3389/fpsyt.2019.00312), 2019-05-08
Supplement: Table_1.pdf [file Table_1.pdf]

## Supplementary Material 1

# Mitochondrial DNA copy number raises the potential of left frontopolar hemodynamic response as a diagnostic marker for distinguishing bipolar disorder from major depressive disorder

Noa Tsujii<sup>†</sup>, Ikuo Otsuka<sup>†</sup>, Satoshi Okazaki, Masaya Yanagi, Shusuke Numata, Naruhisa Yamaki, Yoshihiro Kawakubo, Osamu Shirakawa, Akitoyo Hishimoto<sup>\*</sup>

<sup>†</sup> These authors contributed equally to this work.

<sup>\*</sup> **Correspondence:** Akitoyo Hishimoto: hishipon@med.kobe-u.ac.jp

**Supplementary Table 1. Regression analyses of mtDNA copy number in patients with major depressive or bipolar disorders and healthy control subjects.**

|                                                               | mtDNA copy number |       |          |                             |
|---------------------------------------------------------------|-------------------|-------|----------|-----------------------------|
|                                                               | $\beta^a$         | s.e.  | <i>t</i> | <i>p</i> value <sup>b</sup> |
| <i>Total samples (n = 137); BD (n = 79) and CON (n = 58)</i>  |                   |       |          |                             |
| Phenotype (BD vs. CON)                                        | -0.014            | 0.063 | -2.138   | <b>0.034</b>                |
| Age (years)                                                   | 0.001             | 0.002 | 0.052    | 0.959                       |
| Sex (male vs. female)                                         | -0.010            | 0.063 | -0.165   | 0.869                       |
| <i>Total samples (n = 102); MDD (n = 44) and CON (n = 58)</i> |                   |       |          |                             |
| Phenotype (MDD vs. CON)                                       | 0.108             | 0.042 | 2.578    | <b>0.012</b>                |
| Age (years)                                                   | 0.004             | 0.003 | 1.208    | 0.230                       |
| Sex (male vs. female)                                         | -0.005            | 0.085 | -0.057   | 0.955                       |

<sup>a</sup>  $\beta$  represents regression coefficients derived from generalized linear models.

<sup>b</sup> *p* values shown in bold are significant at < 0.05.

Abbreviations: BD, bipolar disorder; CON, control; MDD, major depressive disorder; s.e., standard error.
