# Supplementary material for: Mitochondrial DNA Copy Number Raises the Potential of Left Frontopolar Hemodynamic Response as a Diagnostic Marker for Distinguishing Bipolar Disorder From Major Depressive Disorder
Source: PubMed Central journal article supplement (PMC6518968; doi:10.3389/fpsyt.2019.00312), 2019-05-08
Supplement: Table_2.pdf [file Table_2.pdf]

### *Supplementary Material 3*

## **Mitochondrial DNA copy number raises the potential of left frontopolar hemodynamic response as a diagnostic marker for distinguishing bipolar disorder from major depressive disorder**

**Noa Tsujii<sup>†</sup>, Ikuo Otsuka<sup>†</sup>, Satoshi Okazaki, Masaya Yanagi, Shusuke Numata, Naruhisa Yamaki, Yoshihiro Kawakubo, Osamu Shirakawa, Akitoyo Hishimoto\***

<sup>†</sup> These authors contributed equally to this work.

\* **Correspondence:** Akitoyo Hishimoto: [hishipon@med.kobe-u.ac.jp](mailto:hishipon@med.kobe-u.ac.jp)

**Supplementary Table 2. Comparison of VFT-related oxy-Hb changes in patients with bipolar disorder and those with major depressive disorder.**

| NIRS Ch | MINI coordinate* |       |      | BD    |       | MDD    |       | P-value |
|---------|------------------|-------|------|-------|-------|--------|-------|---------|
|         | x                | y     | z    | Mean  | SD    | Mean   | SD    |         |
| Ch01    | 64.9             | -28.1 | 42.4 | 0.075 | 0.134 | 0.008  | 0.082 | 0.05832 |
| Ch02    | 59.7             | -3.2  | 42.5 | 0.072 | 0.124 | 0.007  | 0.103 | 0.05110 |
| Ch03    | 47.8             | 22.5  | 44.1 | 0.071 | 0.109 | 0.014  | 0.077 | 0.08210 |
| Ch04    | 32.6             | 40.8  | 43.7 | 0.044 | 0.075 | 0.013  | 0.054 | 0.19602 |
| Ch05    | 12.6             | 52.0  | 44.6 | 0.037 | 0.083 | -0.006 | 0.062 | 0.11446 |
| Ch06    | -10.5            | 52.2  | 44.5 | 0.048 | 0.103 | -0.017 | 0.068 | 0.01066 |
| Ch07    | -30.4            | 41.2  | 43.6 | 0.043 | 0.107 | -0.007 | 0.068 | 0.01556 |
| Ch08    | -46.0            | 23.3  | 43.9 | 0.054 | 0.089 | 0.022  | 0.076 | 0.11857 |
| Ch09    | -57.1            | -1.3  | 42.8 | 0.057 | 0.111 | 0.022  | 0.106 | 0.27955 |
| Ch10    | -63.3            | -25.4 | 42.2 | 0.063 | 0.097 | 0.000  | 0.090 | 0.01038 |

|      |       |       |       |       |       |        |       |         |
|------|-------|-------|-------|-------|-------|--------|-------|---------|
| Ch11 | 68.4  | -19.2 | 17.5  | 0.076 | 0.128 | 0.029  | 0.096 | 0.29265 |
| Ch12 | 63.8  | 7.8   | 20.2  | 0.103 | 0.124 | 0.037  | 0.116 | 0.01257 |
| Ch13 | 53.6  | 35.8  | 20.1  | 0.124 | 0.156 | 0.039  | 0.094 | 0.02276 |
| Ch14 | 37.1  | 57.4  | 19.9  | 0.094 | 0.120 | 0.018  | 0.089 | 0.04392 |
| Ch15 | 14.5  | 68.3  | 21.3  | 0.052 | 0.094 | 0.002  | 0.084 | 0.10214 |
| Ch16 | -12.8 | 67.8  | 20.1  | 0.063 | 0.100 | -0.005 | 0.070 | 0.00176 |
| Ch17 | -35.1 | 57.6  | 20.3  | 0.066 | 0.100 | -0.009 | 0.068 | 0.00053 |
| Ch18 | -51.7 | 36.3  | 19.1  | 0.058 | 0.110 | 0.024  | 0.067 | 0.12256 |
| Ch19 | -61.6 | 9.5   | 20.0  | 0.095 | 0.104 | 0.048  | 0.110 | 0.09445 |
| Ch20 | -67.3 | -16.8 | 18.8  | 0.092 | 0.143 | 0.037  | 0.104 | 0.02601 |
| Ch21 | 69.1  | -13.1 | -10.3 | 0.077 | 0.100 | 0.017  | 0.082 | 0.05326 |
| Ch22 | 59.6  | 10.6  | -8.3  | 0.097 | 0.127 | 0.039  | 0.147 | 0.06203 |
| Ch23 | 52.9  | 42.9  | -5.8  | 0.128 | 0.139 | 0.052  | 0.156 | 0.08000 |
| Ch24 | 38.1  | 63.2  | -4.2  | 0.129 | 0.162 | 0.044  | 0.101 | 0.03646 |
| Ch25 | 14.8  | 70.8  | -2.6  | 0.109 | 0.143 | 0.024  | 0.100 | 0.05110 |
| Ch26 | -12.8 | 71.5  | -2.8  | 0.093 | 0.135 | 0.010  | 0.105 | 0.00726 |
| Ch27 | -35.1 | 63.4  | -4.4  | 0.100 | 0.123 | 0.005  | 0.080 | 0.00029 |
| Ch28 | -50.9 | 44.5  | -6.2  | 0.086 | 0.109 | 0.021  | 0.079 | 0.03210 |
| Ch29 | -57.4 | 14.3  | -7.8  | 0.096 | 0.106 | 0.062  | 0.109 | 0.18695 |

|      |       |       |       |       |       |       |       |         |
|------|-------|-------|-------|-------|-------|-------|-------|---------|
| Ch30 | -68.3 | -11.5 | -12.0 | 0.108 | 0.148 | 0.066 | 0.144 | 0.30545 |
| Ch31 | 67.1  | -35.7 | 29.9  | 0.109 | 0.169 | 0.039 | 0.133 | 0.07414 |
| Ch32 | 66.5  | -10.5 | 31.0  | 0.127 | 0.147 | 0.061 | 0.125 | 0.10804 |
| Ch33 | 57.7  | 16.4  | 31.4  | 0.174 | 0.175 | 0.102 | 0.153 | 0.08374 |
| Ch34 | 44.4  | 40.9  | 32.1  | 0.193 | 0.243 | 0.085 | 0.121 | 0.05219 |
| Ch35 | 24.4  | 57.5  | 32.2  | 0.133 | 0.148 | 0.046 | 0.113 | 0.00877 |
| Ch36 | 2.1   | 60.3  | 32.0  | 0.140 | 0.158 | 0.023 | 0.127 | 0.01280 |
| Ch37 | -22.4 | 57.2  | 32.4  | 0.103 | 0.177 | 0.010 | 0.096 | 0.00722 |
| Ch38 | -42.0 | 41.9  | 31.7  | 0.131 | 0.135 | 0.009 | 0.088 | 0.00004 |
| Ch39 | -55.2 | 17.5  | 31.4  | 0.125 | 0.133 | 0.057 | 0.098 | 0.01896 |
| Ch40 | -64.5 | -8.2  | 31.3  | 0.176 | 0.204 | 0.083 | 0.123 | 0.03626 |
| Ch41 | -66.4 | -33.6 | 30.4  | 0.211 | 0.246 | 0.074 | 0.157 | 0.01269 |
| Ch42 | 70.8  | -29.1 | 2.2   | 0.130 | 0.172 | 0.034 | 0.143 | 0.02410 |
| Ch43 | 65.9  | -4.1  | 5.4   | 0.173 | 0.184 | 0.131 | 0.165 | 0.31038 |
| Ch44 | 58.8  | 26.7  | 8.1   | 0.185 | 0.201 | 0.101 | 0.160 | 0.08207 |
| Ch45 | 46.6  | 52.1  | 7.2   | 0.187 | 0.203 | 0.059 | 0.103 | 0.01922 |
| Ch46 | 26.8  | 67.9  | 8.5   | 0.157 | 0.164 | 0.041 | 0.104 | 0.00926 |
| Ch47 | 2.4   | 68.6  | 8.2   | 0.132 | 0.160 | 0.032 | 0.127 | 0.01077 |
| Ch48 | -23.9 | 68.1  | 8.5   | 0.134 | 0.156 | 0.015 | 0.102 | 0.00053 |

|      |       |       |     |       |       |       |       |         |
|------|-------|-------|-----|-------|-------|-------|-------|---------|
| Ch49 | -44.3 | 52.8  | 6.3 | 0.157 | 0.136 | 0.060 | 0.095 | 0.00134 |
| Ch50 | -56.6 | 28.1  | 7.1 | 0.199 | 0.184 | 0.082 | 0.157 | 0.00382 |
| Ch51 | -63.8 | -1.5  | 6.1 | 0.241 | 0.261 | 0.088 | 0.164 | 0.00862 |
| Ch52 | -69.1 | -27.5 | 1.4 | 0.162 | 0.231 | 0.068 | 0.156 | 0.15120 |

---

Abbreviations: BD, bipolar disorder; Ch, channel; MDD, major depressive disorder.

The threshold for statistical significance was set at Bonferroni-corrected  $p < 0.00096$ .

\* The spatial information for each channel was estimated using data from the Functional Brain Science Laboratory at the Jichi Medical University, Japan [1-3].

## References

1. Rorden, C., and Brett, M. (2000). Stereotaxic display of brain lesions. *Behav Neurol* 12, 191-200.
2. Singh, A.K., Okamoto, M., Dan, H., Jurcak, V., and Dan, I. (2005). Spatial registration of multichannel multi-subject fNIRS data to MNI space without MRI. *Neuroimage* 27, 842-851. doi: 10.1016/j.neuroimage.2005.05.019.
3. Tsuzuki, D., Jurcak, V., Singh, A.K., Okamoto, M., Watanabe, E., and Dan, I. (2007). Virtual spatial registration of stand-alone fNIRS data to MNI space. *Neuroimage* 34, 1506-1518. doi: 10.1016/j.neuroimage.2006.10.043.
