# Supplementary material for: Mitochondrial DNA Copy Number Raises the Potential of Left Frontopolar Hemodynamic Response as a Diagnostic Marker for Distinguishing Bipolar Disorder From Major Depressive Disorder
Source: PubMed Central journal article supplement (PMC6518968; doi:10.3389/fpsyt.2019.00312), 2019-05-08
Supplement: Table_3.pdf [file Table_3.pdf]

### *Supplementary Material 4*

## **Mitochondrial DNA copy number raises the potential of left frontopolar hemodynamic response as a diagnostic marker for distinguishing bipolar disorder from major depressive disorder**

Noa Tsujii<sup>†</sup>, Ikuo Otsuka<sup>†</sup>, Satoshi Okazaki, Masaya Yanagi, Shusuke Numata, Naruhisa Yamaki, Yoshihiro Kawakubo, Osamu Shirakawa, Akitoyo Hishimoto<sup>\*</sup>

<sup>†</sup> These authors contributed equally to this work.

<sup>\*</sup> **Correspondence:** Akitoyo Hishimoto: [hishipon@med.kobe-u.ac.jp](mailto:hishipon@med.kobe-u.ac.jp)

**Supplementary Table 3. Comparison of VFT-related oxy-Hb changes in bipolar-disorder patients with and without medication.**

Abbreviations: BD, bipolar disorder; Ch, channel; MDD, major depressive disorder.

| NIRS<br>Ch | MINI coordinate* |       |      | BD without<br>medication<br>(n=4) |       | BD with<br>medication<br>(n=20) |       | P-<br>value** |
|------------|------------------|-------|------|-----------------------------------|-------|---------------------------------|-------|---------------|
|            | x                | y     | z    | Mean                              | SD    | Mean                            | SD    |               |
| Ch01       | 64.9             | -28.1 | 42.4 | 0.062                             | 0.118 | 0.077                           | 0.140 | 0.84495       |
| Ch02       | 59.7             | -3.2  | 42.5 | 0.093                             | 0.098 | 0.067                           | 0.131 | 0.34204       |
| Ch03       | 47.8             | 22.5  | 44.1 | 0.057                             | 0.100 | 0.075                           | 0.113 | 0.83746       |
| Ch04       | 32.6             | 40.8  | 43.7 | -0.001                            | 0.014 | 0.053                           | 0.080 | 0.34707       |
| Ch05       | 12.6             | 52.0  | 44.6 | -0.007                            | 0.019 | 0.045                           | 0.088 | 0.52494       |
| Ch06       | -10.5            | 52.2  | 44.5 | 0.138                             | 0.184 | 0.030                           | 0.074 | 0.18257       |
| Ch07       | -30.4            | 41.2  | 43.6 | 0.041                             | 0.203 | 0.043                           | 0.086 | 1.00000       |
| Ch08       | -46.0            | 23.3  | 43.9 | 0.063                             | 0.032 | 0.053                           | 0.097 | 0.79409       |
| Ch09       | -57.1            | -1.3  | 42.8 | 0.105                             | 0.045 | 0.050                           | 0.118 | 0.08701       |
| Ch10       | -63.3            | -25.4 | 42.2 | 0.112                             | 0.110 | 0.053                           | 0.094 | 0.18257       |
| Ch11       | 68.4             | -19.2 | 17.5 | 0.036                             | 0.068 | 0.083                           | 0.137 | 0.62733       |
| Ch12       | 63.8             | 7.8   | 20.2 | 0.054                             | 0.082 | 0.113                           | 0.131 | 0.50548       |
| Ch13       | 53.6             | 35.8  | 20.1 | 0.103                             | 0.096 | 0.128                           | 0.168 | 0.61118       |
| Ch14       | 37.1             | 57.4  | 19.9 | 0.067                             | 0.170 | 0.099                           | 0.113 | 0.57538       |
| Ch15       | 14.5             | 68.3  | 21.3 | 0.005                             | 0.043 | 0.061                           | 0.100 | 0.73687       |
| Ch16       | -12.8            | 67.8  | 20.1 | 0.103                             | 0.079 | 0.055                           | 0.104 | 0.47713       |
| Ch17       | -35.1            | 57.6  | 20.3 | 0.089                             | 0.158 | 0.062                           | 0.089 | 1.00000       |
| Ch18       | -51.7            | 36.3  | 19.1 | -0.007                            | 0.166 | 0.071                           | 0.097 | 0.62733       |

|      |       |       |       |       |       |       |       |         |
|------|-------|-------|-------|-------|-------|-------|-------|---------|
| Ch19 | -61.6 | 9.5   | 20.0  | 0.164 | 0.088 | 0.081 | 0.104 | 0.11462 |
| Ch20 | -67.3 | -16.8 | 18.8  | 0.110 | 0.097 | 0.088 | 0.153 | 0.68154 |
| Ch21 | 69.1  | -13.1 | -10.3 | 0.090 | 0.101 | 0.074 | 0.103 | 0.85187 |
| Ch22 | 59.6  | 10.6  | -8.3  | 0.077 | 0.106 | 0.101 | 0.132 | 0.92105 |
| Ch23 | 52.9  | 42.9  | -5.8  | 0.143 | 0.071 | 0.125 | 0.150 | 0.63364 |
| Ch24 | 38.1  | 63.2  | -4.2  | 0.111 | 0.115 | 0.133 | 0.172 | 1.00000 |
| Ch25 | 14.8  | 70.8  | -2.6  | 0.064 | 0.138 | 0.118 | 0.145 | 0.73687 |
| Ch26 | -12.8 | 71.5  | -2.8  | 0.056 | 0.112 | 0.098 | 0.140 | 0.76341 |
| Ch27 | -35.1 | 63.4  | -4.4  | 0.111 | 0.129 | 0.097 | 0.125 | 0.91097 |
| Ch28 | -50.9 | 44.5  | -6.2  | 0.060 | 0.121 | 0.092 | 0.109 | 0.68154 |
| Ch29 | -57.4 | 14.3  | -7.8  | 0.094 | 0.076 | 0.096 | 0.113 | 0.97007 |
| Ch30 | -68.3 | -11.5 | -12.0 | 0.239 | 0.131 | 0.085 | 0.141 | 0.14561 |
| Ch31 | 67.1  | -35.7 | 29.9  | 0.124 | 0.140 | 0.105 | 0.177 | 0.90683 |
| Ch32 | 66.5  | -10.5 | 31.0  | 0.149 | 0.090 | 0.122 | 0.159 | 0.65208 |
| Ch33 | 57.7  | 16.4  | 31.4  | 0.097 | 0.078 | 0.193 | 0.189 | 0.33519 |
| Ch34 | 44.4  | 40.9  | 32.1  | 0.158 | 0.051 | 0.201 | 0.267 | 0.45647 |
| Ch35 | 24.4  | 57.5  | 32.2  | 0.093 | 0.179 | 0.141 | 0.145 | 0.79409 |
| Ch36 | 2.1   | 60.3  | 32.0  | 0.106 | 0.080 | 0.143 | 0.165 | 0.95238 |
| Ch37 | -22.4 | 57.2  | 32.4  | 0.129 | 0.116 | 0.101 | 0.184 | 0.70130 |
| Ch38 | -42.0 | 41.9  | 31.7  | 0.118 | 0.009 | 0.133 | 0.142 | 0.77922 |
| Ch39 | -55.2 | 17.5  | 31.4  | 0.108 | 0.162 | 0.128 | 0.132 | 0.97007 |
| Ch40 | -64.5 | -8.2  | 31.3  | 0.334 | 0.375 | 0.144 | 0.147 | 0.43121 |
| Ch41 | -66.4 | -33.6 | 30.4  | 0.217 | 0.134 | 0.210 | 0.267 | 0.65208 |
| Ch42 | 70.8  | -29.1 | 2.2   | 0.096 | 0.226 | 0.137 | 0.165 | 1.00000 |
| Ch43 | 65.9  | -4.1  | 5.4   | 0.115 | 0.015 | 0.182 | 0.196 | 0.69791 |
| Ch44 | 58.8  | 26.7  | 8.1   | 0.144 | 0.021 | 0.191 | 0.217 | 0.88722 |
| Ch45 | 46.6  | 52.1  | 7.2   | 0.147 | 0.094 | 0.195 | 0.220 | 0.96872 |
| Ch46 | 26.8  | 67.9  | 8.5   | 0.122 | 0.042 | 0.164 | 0.179 | 0.68154 |
| Ch47 | 2.4   | 68.6  | 8.2   | 0.177 | 0.075 | 0.125 | 0.170 | 0.40429 |
| Ch48 | -23.9 | 68.1  | 8.5   | 0.172 | 0.064 | 0.130 | 0.162 | 0.55411 |
| Ch49 | -44.3 | 52.8  | 6.3   | 0.157 | 0.068 | 0.157 | 0.144 | 0.63467 |
| Ch50 | -56.6 | 28.1  | 7.1   | 0.288 | 0.219 | 0.181 | 0.178 | 0.15735 |
| Ch51 | -63.8 | -1.5  | 6.1   | 0.325 | 0.330 | 0.221 | 0.250 | 0.57444 |
| Ch52 | -69.1 | -27.5 | 1.4   | 0.109 | 0.224 | 0.174 | 0.238 | 0.63525 |

Abbreviations: BD, bipolar disorder; Ch, channel; MDD, major depressive disorder.

The threshold for statistical significance was set at Bonferroni-corrected  $p < 0.00096$ .

\* The spatial information for each channel was estimated using data from the Functional Brain Science Laboratory at the Jichi Medical University, Japan [1-3].

\*\*Mann-Whitney U test

## References

1. Rorden, C., and Brett, M. (2000). Stereotaxic display of brain lesions. *Behav Neurol* 12, 191-200.
2. Singh, A.K., Okamoto, M., Dan, H., Jurcak, V., and Dan, I. (2005). Spatial registration of multichannel multi-subject fNIRS data to MNI space without MRI. *Neuroimage* 27, 842-851. doi: 10.1016/j.neuroimage.2005.05.019.
3. Tsuzuki, D., Jurcak, V., Singh, A.K., Okamoto, M., Watanabe, E., and Dan, I. (2007). Virtual spatial registration of stand-alone fNIRS data to MNI space. *Neuroimage* 34, 1506-1518. doi: 10.1016/j.neuroimage.2006.10.043.
