# Supplementary material for: Mitochondrial DNA Copy Number Raises the Potential of Left Frontopolar Hemodynamic Response as a Diagnostic Marker for Distinguishing Bipolar Disorder From Major Depressive Disorder
Source: PubMed Central journal article supplement (PMC6518968; doi:10.3389/fpsyt.2019.00312), 2019-05-08
Supplement: Table_4.pdf [file Table_4.pdf]

## *Supplementary Material 5*

# **Mitochondrial DNA copy number raises the potential of left frontopolar hemodynamic response as a diagnostic marker for distinguishing bipolar disorder from major depressive disorder**

**Noa Tsujii<sup>†</sup>, Ikuo Otsuka<sup>†</sup>, Satoshi Okazaki, Masaya Yanagi, Shusuke Numata, Naruhisa Yamaki, Yoshihiro Kawakubo, Osamu Shirakawa, Akitoyo Hishimoto\***

<sup>†</sup> These authors contributed equally to this work.

\* **Correspondence:** Akitoyo Hishimoto: [hishipon@med.kobe-u.ac.jp](mailto:hishipon@med.kobe-u.ac.jp)

### **Supplementary Table 4. Comparison of VFT-related oxy-Hb changes in patients with major depressive disorder with and without medication**

Abbreviations: BD, bipolar disorder; Ch, channel; MDD, major depressive disorder.

| NIRS<br>Ch | MINI coordinate* |       |      | MDD without<br>medication<br>(n=11) |       | MDD with<br>medication<br>(n=33) |       | P-<br>value** |
|------------|------------------|-------|------|-------------------------------------|-------|----------------------------------|-------|---------------|
|            | x                | y     | z    | Mean                                | SD    | Mean                             | SD    |               |
| Ch01       | 64.9             | -28.1 | 42.4 | 0.033                               | 0.086 | 0.000                            | 0.080 | 0.20112       |
| Ch02       | 59.7             | -3.2  | 42.5 | 0.070                               | 0.106 | -0.016                           | 0.094 | 0.01737       |
| Ch03       | 47.8             | 22.5  | 44.1 | 0.069                               | 0.062 | -0.006                           | 0.073 | 0.00711       |
| Ch04       | 32.6             | 40.8  | 43.7 | 0.041                               | 0.057 | 0.003                            | 0.051 | 0.05076       |
| Ch05       | 12.6             | 52.0  | 44.6 | 0.033                               | 0.050 | -0.019                           | 0.061 | 0.01548       |
| Ch06       | -10.5            | 52.2  | 44.5 | 0.013                               | 0.065 | -0.026                           | 0.068 | 0.16091       |
| Ch07       | -30.4            | 41.2  | 43.6 | 0.038                               | 0.078 | -0.020                           | 0.059 | 0.06740       |
| Ch08       | -46.0            | 23.3  | 43.9 | 0.062                               | 0.073 | 0.010                            | 0.074 | 0.09885       |
| Ch09       | -57.1            | -1.3  | 42.8 | 0.065                               | 0.108 | 0.006                            | 0.103 | 0.23724       |
| Ch10       | -63.3            | -25.4 | 42.2 | 0.042                               | 0.079 | -0.014                           | 0.090 | 0.08187       |
| Ch11       | 68.4             | -19.2 | 17.5 | 0.017                               | 0.089 | 0.033                            | 0.100 | 0.76890       |
| Ch12       | 63.8             | 7.8   | 20.2 | 0.039                               | 0.114 | 0.036                            | 0.119 | 0.76890       |
| Ch13       | 53.6             | 35.8  | 20.1 | 0.094                               | 0.072 | 0.022                            | 0.095 | 0.00743       |
| Ch14       | 37.1             | 57.4  | 19.9 | 0.024                               | 0.066 | 0.016                            | 0.096 | 0.81005       |
| Ch15       | 14.5             | 68.3  | 21.3 | 0.045                               | 0.081 | -0.013                           | 0.081 | 0.05211       |
| Ch16       | -12.8            | 67.8  | 20.1 | 0.025                               | 0.076 | -0.015                           | 0.066 | 0.13046       |
| Ch17       | -35.1            | 57.6  | 20.3 | 0.015                               | 0.089 | -0.017                           | 0.059 | 0.25209       |
| Ch18       | -51.7            | 36.3  | 19.1 | 0.061                               | 0.070 | 0.012                            | 0.063 | 0.07368       |

|      |       |       |       |       |       |        |       |         |
|------|-------|-------|-------|-------|-------|--------|-------|---------|
| Ch19 | -61.6 | 9.5   | 20.0  | 0.064 | 0.095 | 0.042  | 0.116 | 0.55176 |
| Ch20 | -67.3 | -16.8 | 18.8  | 0.048 | 0.113 | 0.034  | 0.102 | 0.61157 |
| Ch21 | 69.1  | -13.1 | -10.3 | 0.058 | 0.059 | 0.002  | 0.085 | 0.03539 |
| Ch22 | 59.6  | 10.6  | -8.3  | 0.008 | 0.082 | 0.048  | 0.161 | 0.65572 |
| Ch23 | 52.9  | 42.9  | -5.8  | 0.077 | 0.143 | 0.045  | 0.161 | 0.51291 |
| Ch24 | 38.1  | 63.2  | -4.2  | 0.064 | 0.096 | 0.037  | 0.103 | 0.61150 |
| Ch25 | 14.8  | 70.8  | -2.6  | 0.055 | 0.089 | 0.014  | 0.103 | 0.30782 |
| Ch26 | -12.8 | 71.5  | -2.8  | 0.052 | 0.106 | -0.005 | 0.103 | 0.15285 |
| Ch27 | -35.1 | 63.4  | -4.4  | 0.039 | 0.080 | -0.006 | 0.078 | 0.13763 |
| Ch28 | -50.9 | 44.5  | -6.2  | 0.062 | 0.080 | 0.007  | 0.074 | 0.06476 |
| Ch29 | -57.4 | 14.3  | -7.8  | 0.085 | 0.070 | 0.055  | 0.119 | 0.26011 |
| Ch30 | -68.3 | -11.5 | -12.0 | 0.028 | 0.106 | 0.078  | 0.153 | 0.19563 |
| Ch31 | 67.1  | -35.7 | 29.9  | 0.053 | 0.085 | 0.035  | 0.146 | 0.68551 |
| Ch32 | 66.5  | -10.5 | 31.0  | 0.053 | 0.055 | 0.064  | 0.145 | 0.89000 |
| Ch33 | 57.7  | 16.4  | 31.4  | 0.086 | 0.055 | 0.107  | 0.173 | 0.61136 |
| Ch34 | 44.4  | 40.9  | 32.1  | 0.116 | 0.130 | 0.076  | 0.120 | 0.38836 |
| Ch35 | 24.4  | 57.5  | 32.2  | 0.049 | 0.099 | 0.045  | 0.118 | 0.87637 |
| Ch36 | 2.1   | 60.3  | 32.0  | 0.055 | 0.098 | 0.013  | 0.135 | 0.64958 |
| Ch37 | -22.4 | 57.2  | 32.4  | 0.060 | 0.095 | -0.006 | 0.092 | 0.09318 |
| Ch38 | -42.0 | 41.9  | 31.7  | 0.038 | 0.058 | 0.001  | 0.093 | 0.28880 |
| Ch39 | -55.2 | 17.5  | 31.4  | 0.071 | 0.066 | 0.052  | 0.107 | 0.59283 |
| Ch40 | -64.5 | -8.2  | 31.3  | 0.042 | 0.087 | 0.096  | 0.131 | 0.41388 |
| Ch41 | -66.4 | -33.6 | 30.4  | 0.002 | 0.072 | 0.101  | 0.172 | 0.06160 |
| Ch42 | 70.8  | -29.1 | 2.2   | 0.047 | 0.107 | 0.031  | 0.153 | 0.92398 |
| Ch43 | 65.9  | -4.1  | 5.4   | 0.064 | 0.082 | 0.149  | 0.178 | 0.24222 |
| Ch44 | 58.8  | 26.7  | 8.1   | 0.141 | 0.162 | 0.090  | 0.161 | 0.19883 |
| Ch45 | 46.6  | 52.1  | 7.2   | 0.089 | 0.111 | 0.050  | 0.101 | 0.44366 |
| Ch46 | 26.8  | 67.9  | 8.5   | 0.097 | 0.094 | 0.021  | 0.101 | 0.05954 |
| Ch47 | 2.4   | 68.6  | 8.2   | 0.096 | 0.141 | 0.010  | 0.116 | 0.09246 |
| Ch48 | -23.9 | 68.1  | 8.5   | 0.051 | 0.075 | 0.003  | 0.108 | 0.16983 |
| Ch49 | -44.3 | 52.8  | 6.3   | 0.082 | 0.062 | 0.053  | 0.103 | 0.46310 |
| Ch50 | -56.6 | 28.1  | 7.1   | 0.085 | 0.116 | 0.081  | 0.171 | 0.75649 |
| Ch51 | -63.8 | -1.5  | 6.1   | 0.035 | 0.104 | 0.106  | 0.178 | 0.27196 |
| Ch52 | -69.1 | -27.5 | 1.4   | 0.027 | 0.120 | 0.082  | 0.165 | 0.32929 |

Abbreviations: BD, bipolar disorder; Ch, channel; MDD, major depressive disorder.

The threshold for statistical significance was set at Bonferroni-corrected  $p < 0.00096$ .

\* The spatial information for each channel was estimated using data from the Functional Brain Science Laboratory at the Jichi Medical University, Japan [1-3].

\*\*Mann-Whitney U test

## References

1. Rorden, C., and Brett, M. (2000). Stereotaxic display of brain lesions. *Behav Neurol* 12, 191-200.
2. Singh, A.K., Okamoto, M., Dan, H., Jurcak, V., and Dan, I. (2005). Spatial registration of multichannel multi-subject fNIRS data to MNI space without MRI. *Neuroimage* 27, 842-851. doi: 10.1016/j.neuroimage.2005.05.019.
3. Tsuzuki, D., Jurcak, V., Singh, A.K., Okamoto, M., Watanabe, E., and Dan, I. (2007). Virtual spatial registration of stand-alone fNIRS data to MNI space. *Neuroimage* 34, 1506-1518. doi: 10.1016/j.neuroimage.2006.10.043.
